# Supplementary material
Source: publisher site journal article supplement (https://www.dovepress.com/article/253429)
Supplement: Supplementary file 1 [file get_supplementary_file.php]

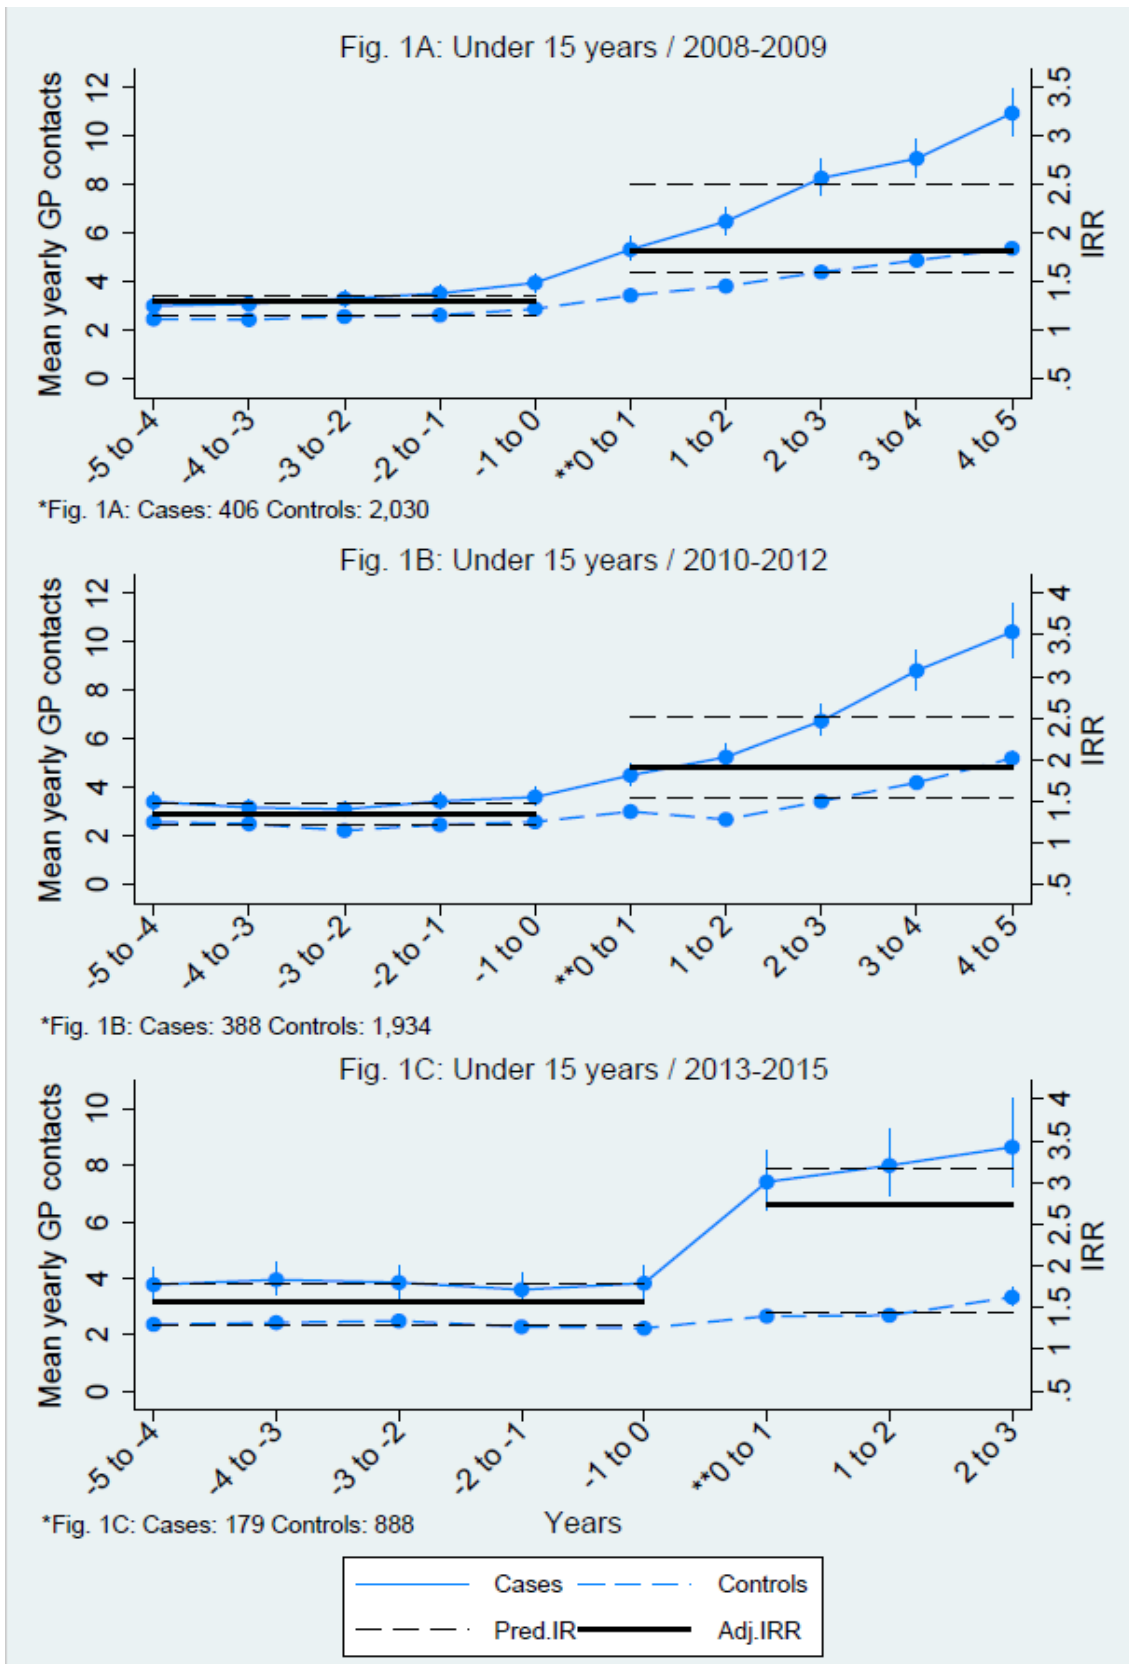

Suppl. figure 1\*: Mean yearly GP contacts and the ratio of the adjusted IRR from prior to vaccination compared to after vaccination between cases and matched controls. (A) Under 15 years / 2008-2009. (B) Under 15 years / 2010-2012. (C) Under 15 years / 2013-2015. \*\* Date of vaccination included

Fig. 2A: Above 15 years / 2008-2009

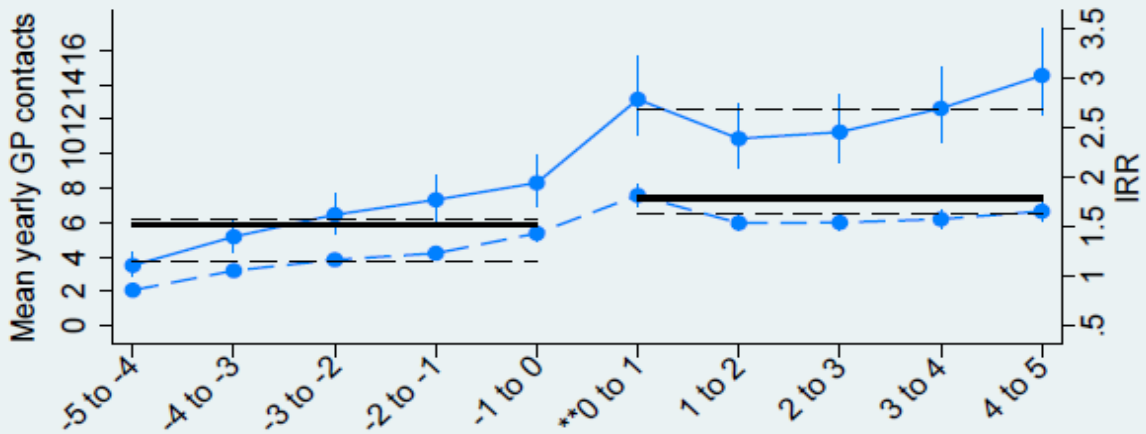

\*Fig. 2A: Cases: 91 Controls: 447

Fig. 2B: Above 15 years / 2010-2012

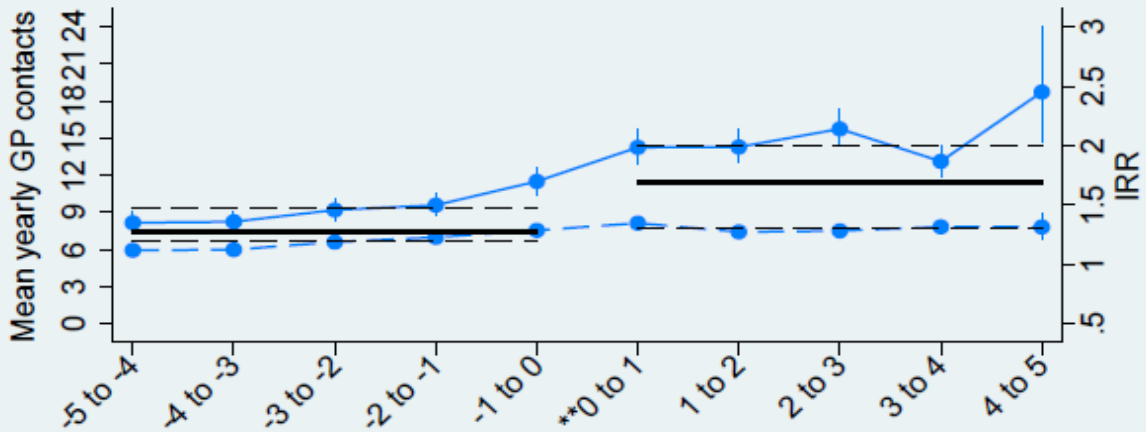

\*Fig. 2B: Cases: 249 Controls: 1,228

Fig. 2C: Above 15 years / 2013-2015

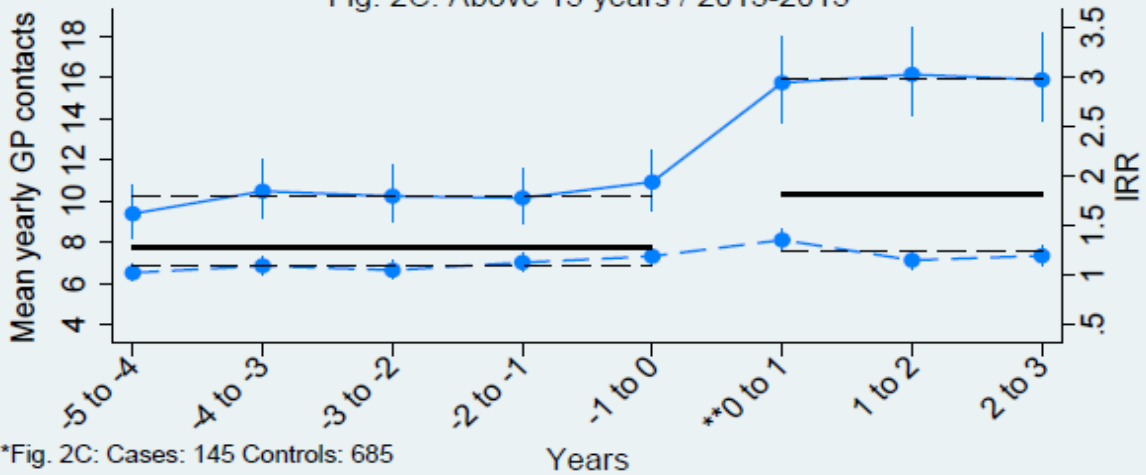

\*Fig. 2C: Cases: 145 Controls: 685

Years

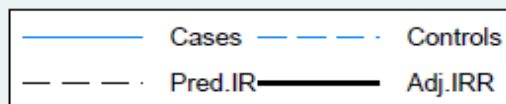

Suppl. figure 2\*: Mean yearly GP contacts and the ratio of the adjusted IRR from prior to vaccination compared to after vaccination between cases and matched controls. (A) Above 15 years / 2008-2009. (B) Above 15 years / 2010-2012. (C) Above 15 years / 2013-2015. \*\* Date of vaccination included

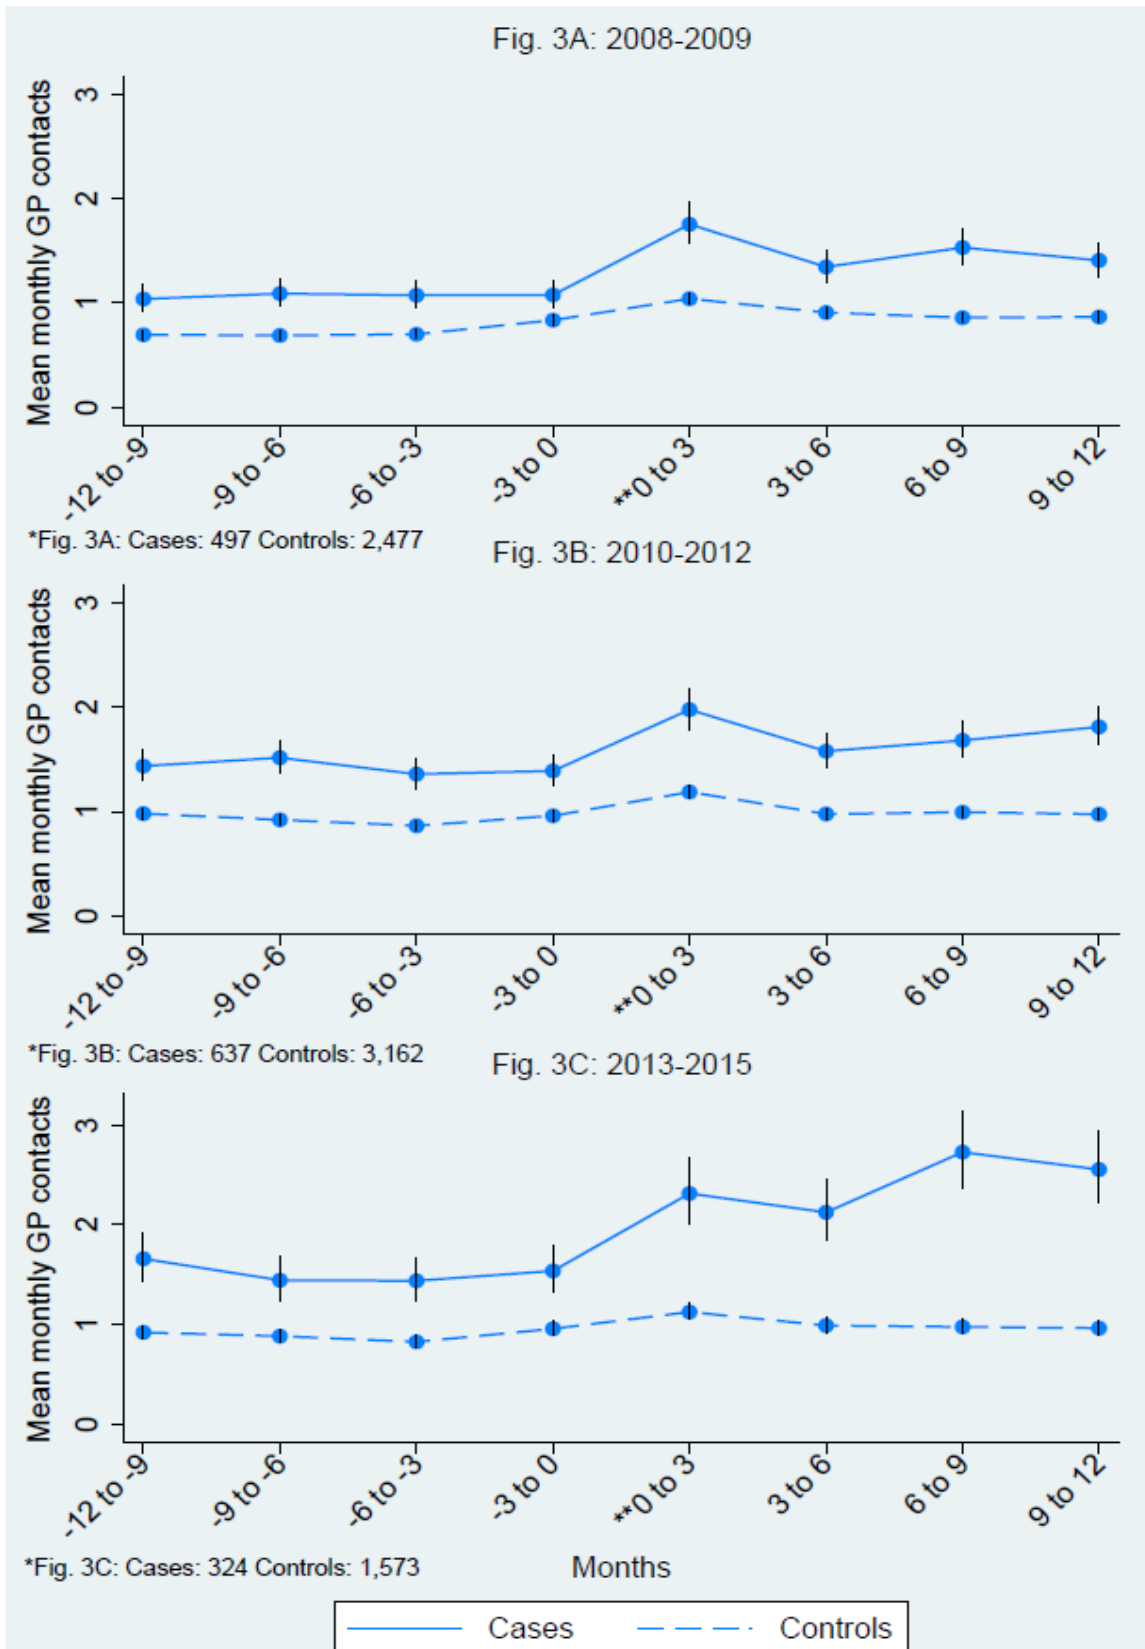

Suppl. figure 3\*: Mean monthly GP contacts 12 months prior to and 12 months following vaccination for cases and controls, divided into three months intervals. (A) 2008-2009. (B) 2010-2012. (C) 2013-2015. \*\* Date of vaccination included
